# Supplementary material for: Transcriptomic Characterization of C57BL/6 Mouse Embryonic Stem Cell Differentiation and Its Modulation by Developmental Toxicants
Source: PLoS One. 2014 Sep 23;9(9):e108510. doi: 10.1371/journal.pone.0108510 (PMC4172731; doi:10.1371/journal.pone.0108510)
Supplement: Table S5 — List of 16 GO terms in the biological process (BP) category at all levels (GOTERM_BP_ALL) enriched by the 205 DEGs induced by VPA exposure. DAVID was used for the analysis using 57 unique DAVID IDs (annotated genes) mapped from the 205 DEGs induced by VPA. The Mus musculus (mouse) whole genome was used as background. Statistical enrichment was determined through a modified Fisher's exact test (p<0.05) and count threshold >4. The column under “Count” indicates the number of DEGs involved in the specific GO term, while the column under “%” indicates the number of DEGs involved in the GO term as a percentage of the total number of annotated genes (57). (XLSX) [file pone.0108510.s005.xlsx]

## Sheet: VPA_14 go terms
Term	Name	Count	%	p-Value	Fold Enrichment
GO:0007275	multicellular organismal development	18	31.5789	0.000450889	2.36102
GO:0032502	developmental process	18	31.5789	0.00122896	2.16994
GO:0009653	anatomical structure morphogenesis	10	17.5439	0.00453183	2.96835
GO:0048705	skeletal system morphogenesis	4	7.01754	0.00660965	10.1746
GO:0051179	localization	16	28.0702	0.00691124	1.98977
GO:0001501	skeletal system development	5	8.77193	0.00972585	5.80131
GO:0048610	reproductive cellular process	4	7.01754	0.0143564	7.64565
GO:0048856	anatomical structure development	13	22.807	0.0200335	1.981
GO:0003002	regionalization	4	7.01754	0.0250935	6.18083
GO:0009887	organ morphogenesis	6	10.5263	0.0297533	3.34015
GO:0032501	multicellular organismal process	20	35.0877	0.0304174	1.52772
GO:0007610	behavior	5	8.77193	0.0309826	4.0824
GO:0051234	establishment of localization	13	22.807	0.0361407	1.82306
GO:0003006	reproductive developmental process	4	7.01754	0.0427116	5.01022
